# Supplementary material for: Transcriptomic Profiling of Dromedary Camels Immunised with a MERS Vaccine Candidate
Source: MDPI journal article supplement (doi:10.3390/vetsci8080156), 2021-08-03
Supplement: s1 [file s1]

## Supplementary file

**Table S1.** Landscape of camel transcriptional regulation 6, 12, and 24h after injection with ChAdOx2-MERS vaccine (All comparisons are done with respect to time 0). A gene is defined as differentially regulated in a statistically significant way when  $\text{abs}(\log_2(\text{fold change})) \geq 1$  and  $\text{FDR} \leq 0.05$ . All the genes in the table have  $\text{abs}(\log_2(\text{fold change})) \geq 1$ ; their FDR is typeset in bold whenever  $\text{FDR} \leq 0.05$ , i.e. whenever differential regulation for that gene at the time point considered is statistically significant. LFC: limit fold change; FDR: false discovery rate; T=6h: study point 6 hours post vaccination; T=12h: study point 12 hours post vaccination; T=24h: study point 24 hours post vaccination.

| Gene name<br>(CamDro3<br>names) | Gene name<br>(mapped to<br>ENSEMBL human) | Gene<br>name<br>(InterPro<br>) | Gene<br>name<br>(human<br>Readable) | Gene description                          | T=6h  |               | T=12h |                | T=24h   |                |
|---------------------------------|-------------------------------------------|--------------------------------|-------------------------------------|-------------------------------------------|-------|---------------|-------|----------------|---------|----------------|
|                                 |                                           |                                |                                     |                                           | LFC   | FDR           | LFC   | FDR            | LFC     | FDR            |
| Cadr_000009117                  | ENSG00000168209                           | Q9NX09                         | DDIT4                               | DNA damage-inducible transcript 4 protein | -2.57 | <b>0.0021</b> | -2.84 | <b>0.00078</b> | -2.94   | <b>0.00056</b> |
| Cadr_000018634                  | ENSG00000179094                           | O15534                         | PER1                                | Period circadian protein homolog 1        | -1.58 | <b>0.013</b>  | -1.76 | <b>0.015</b>   | -1.96   | <b>0.005</b>   |
| Cadr_000022112                  | ENSG00000204539                           | Q15517                         | CDSN                                | Corneodesmosin                            | 7.49  | <b>0.0052</b> | 5.91  | <b>0.035</b>   | 7.2     | <b>0.0053</b>  |
| Cadr_000028245                  | ENSG00000182541                           | P53671                         | LIMK2                               | LIM domain kinase 2                       | 2.47  | <b>0.0072</b> | 1.31  | 0.063          | 0.228   | 0.99           |
| Cadr_000005463                  |                                           |                                |                                     |                                           | 2.23  | <b>0.013</b>  | 1.87  | 0.054          | 0.237   | 0.99           |
| Cadr_000011526                  | ENSG00000089351                           | Q96CP6                         | GRAMD1A                             | Protein Aster-A                           | 1.54  | <b>0.013</b>  | 0.845 | 0.072          | -0.0587 | 1              |
| Cadr_000028656                  | ENSG00000128789                           | Q969U7                         | PSMG2                               | Proteasome assembly chaperone 2           | 1.06  | <b>0.013</b>  | 0.689 | 0.059          | 0.0823  | 0.99           |
| Cadr_000001885                  | ENSG00000169429                           | P10145                         | CXCL8                               | Interleukin-8                             | -1.8  | <b>0.023</b>  | -2.01 | <b>0.028</b>   | -2.08   | <b>0.015</b>   |
| Cadr_000011353                  |                                           |                                |                                     |                                           | 1.52  | <b>0.017</b>  | 0.455 | 0.42           | -0.181  | 0.98           |
| Cadr_000002514                  | ENSG00000198883                           | Q96PV4                         | PNMA5                               | Paraneoplastic antigen-like protein 5     | 3.89  | <b>0.023</b>  | 0.915 | 0.61           | -0.0643 | 1              |

|                |                 |        |        |                                                             |       |              |        |       |        |       |
|----------------|-----------------|--------|--------|-------------------------------------------------------------|-------|--------------|--------|-------|--------|-------|
| Cadr_000003390 | ENSG00000102312 | Q9H237 | PORCN  | Protein-serine O-palmitoleoyltransferase porcupine          | 2.24  | <b>0.023</b> | 0.358  | 0.79  | -0.36  | 0.98  |
| Cadr_000004852 | ENSG00000133710 | Q9NQ38 | SPINK5 | Serine protease inhibitor Kazal-type 5                      | 5.88  | <b>0.023</b> | 5.44   | 0.054 | 5.76   | 0.061 |
| Cadr_000010146 | ENSG00000135587 | O60906 | SMPD2  | Sphingomyelin phosphodiesterase 2                           | 1.33  | <b>0.023</b> | 0.583  | 0.22  | 0.227  | 0.97  |
| Cadr_000011846 | ENSG00000069399 | P20749 | BCL3   | B-cell lymphoma 3 protein                                   | 1.19  | <b>0.023</b> | 0.688  | 0.096 | 0.0744 | 1     |
| Cadr_000021957 | ENSG00000096060 | Q13451 | FKBP5  | Peptidyl-prolyl cis-trans isomerase FKBP5                   | -2.45 | <b>0.023</b> | -2.16  | 0.054 | -2.25  | 0.078 |
| Cadr_000023115 | ENSG00000090104 | Q08116 | RGS1   | Regulator of G-protein signaling 1                          | -2.85 | <b>0.023</b> | -0.514 | 0.73  | -0.943 | 0.68  |
| Cadr_000023477 | ENSG00000133055 | Q13203 | MYBPH  | Myosin-binding protein H                                    | 2.07  | <b>0.023</b> | 1.59   | 0.056 | 0.541  | 0.85  |
| Cadr_000023835 |                 |        |        |                                                             | 1.47  | <b>0.023</b> | 0.875  | 0.097 | 0.208  | 0.98  |
| Cadr_000028639 | ENSG00000156052 | P50148 | GNAQ   | Guanine nucleotide-binding protein G subunit alpha          | 1.08  | <b>0.023</b> | 0.656  | 0.094 | 0.261  | 0.91  |
| Cadr_000026275 | ENSG00000179361 | Q8IVW6 | ARID3B | AT-rich interactive domain-containing protein 3B            | 1.13  | <b>0.027</b> | 0.315  | 0.56  | 0.166  | 0.98  |
| Cadr_000007726 |                 |        |        | hypothetical protein                                        | 1.47  | <b>0.028</b> | 0.717  | 0.2   | 0.72   | 0.43  |
| Cadr_000012219 | ENSG00000186818 | Q8NHJ6 | LILRB4 | Leukocyte immunoglobulin-like receptor subfamily B member 4 | 1.61  | <b>0.028</b> | 0.934  | 0.12  | 0.186  | 0.99  |
| Cadr_000015194 | ENSG00000110195 | P15328 | FOLR1  | Folate receptor alpha                                       | 3.16  | <b>0.028</b> | 1.4    | 0.22  | 0.448  | 0.98  |
| Cadr_000016822 | ENSG00000167767 | Q6KB66 | KRT80  | Keratin, type II cytoskeletal 80                            | 3.9   | <b>0.034</b> | 2.63   | 0.086 | 3.84   | 0.078 |

|                       |                     |        |          |                                                       |           |              |       |              |              |              |
|-----------------------|---------------------|--------|----------|-------------------------------------------------------|-----------|--------------|-------|--------------|--------------|--------------|
| <b>Cadr_000030773</b> | ENSG0000000851<br>6 | Q9NPA2 | MMP25    | Matrix metalloproteinase-25                           | 1.87      | <b>0.034</b> | 0.99  | 0.17         | -<br>0.00766 | 1            |
| <b>Cadr_000019826</b> | ENSG0000009292<br>9 | Q70J99 | UNC13D   | Protein unc-13 homolog D                              | 1.22      | <b>0.036</b> | 0.616 | 0.2          | -0.0201      | 1            |
| <b>Cadr_000000564</b> | ENSG0000011391<br>6 | P41182 | BCL6     | B-cell lymphoma 6 protein                             | 1.98      | <b>0.041</b> | 1.34  | 0.092        | 0.269        | 0.99         |
| <b>Cadr_000001890</b> | ENSG0000016373<br>9 | P09341 | CXCL1    | Growth-regulated alpha protein                        | -<br>3.21 | <b>0.07</b>  | -5.61 | <b>0.041</b> | -5.17        | <b>0.05</b>  |
| <b>Cadr_000002580</b> |                     |        |          | hypothetical protein                                  | 1.65      | <b>0.041</b> | 0.922 | 0.18         | -0.104       | 1            |
| <b>Cadr_000004067</b> | ENSG0000016868<br>5 | P16871 | IL7R     | Interleukin-7 receptor subunit alpha                  | -<br>1.51 | <b>0.041</b> | -1.16 | 0.073        | -1.2         | 0.19         |
| <b>Cadr_000010587</b> | ENSG0000014647<br>7 | O75751 | SLC22A3  | Solute carrier family 22 member 3                     | 2.2       | <b>0.041</b> | 0.538 | 0.68         | 0.182        | 1            |
| <b>Cadr_000012111</b> | ENSG0000014251<br>2 | Q96LC7 | SIGLEC10 | Sialic acid-binding Ig-like lectin 10                 | 1.29      | <b>0.041</b> | 1.08  | 0.063        | 0.404        | 0.84         |
| <b>Cadr_000012112</b> | ENSG0000012945<br>0 | Q9Y336 | SIGLEC9  | Sialic acid-binding Ig-like lectin 9                  | 1.76      | <b>0.041</b> | 1.33  | 0.073        | 0.564        | 0.81         |
| <b>Cadr_000016314</b> | ENSG0000017528<br>7 | Q5SRE7 | PHYHD1   | Phytanoyl-CoA dioxygenase domain-containing protein 1 | 1.88      | <b>0.041</b> | 1.06  | 0.16         | -0.921       | 0.49         |
| <b>Cadr_000016800</b> | ENSG0000020542<br>0 | P02538 | KRT6A    | Keratin, type II cytoskeletal 6A                      | 5.61      | 0.058        | 6.51  | 0.054        | 7.61         | <b>0.041</b> |
| <b>Cadr_000025545</b> | ENSG0000018672<br>3 | Q9Y4A9 | OR10H1   | Olfactory receptor 10H1                               | 2.74      | <b>0.041</b> | 0.248 | 0.91         | 0.416        | 0.98         |
| <b>Cadr_000027936</b> | ENSG0000013078<br>3 | Q6P9F0 | CCDC62   | Coiled-coil domain-containing protein 62              | 1.31      | <b>0.041</b> | 0.899 | 0.096        | 0.734        | 0.41         |
| <b>Cadr_000028624</b> | ENSG0000016845<br>4 | Q86VQ3 | TXNDC2   | Thioredoxin domain-containing protein 2               | 2.18      | <b>0.041</b> | 1.9   | 0.057        | 1.29         | 0.36         |
| <b>Cadr_000029654</b> | ENSG0000014745<br>4 | Q9NYZ2 | SLC25A37 | Mitoferrin-1                                          | 1.87      | <b>0.041</b> | 1.8   | 0.054        | 0.816        | 0.58         |

|                       |                     |        |        |                                                                 |      |              |       |       |        |              |
|-----------------------|---------------------|--------|--------|-----------------------------------------------------------------|------|--------------|-------|-------|--------|--------------|
| <b>Cadr_000012282</b> | ENSG0000016768<br>5 | Q8N0Y2 | ZNF444 | Zinc finger protein 444                                         | 1.71 | <b>0.042</b> | 0.93  | 0.19  | 0.0416 | 1            |
| <b>Cadr_000013472</b> | ENSG0000017579<br>3 | P31947 | SFN    | 14-3-3 protein sigma                                            | 1.36 | <b>0.043</b> | 0.573 | 0.37  | 0.251  | 0.98         |
| <b>Cadr_000015197</b> | ENSG0000016545<br>8 | O15357 | INPPL1 | Phosphatidylinositol<br>3,4,5-trisphosphate 5-<br>phosphatase 2 | 1.01 | <b>0.043</b> | 0.477 | 0.29  | 0.233  | 0.96         |
| <b>Cadr_000009001</b> | ENSG0000027643<br>0 | B3EWG5 | FAM25C | Protein FAM25C                                                  | 4.83 | <b>0.047</b> | 4.08  | 0.065 | 4.95   | 0.096        |
| <b>Cadr_000016797</b> | ENSG0000020542<br>0 | P02538 | KRT6A  | Keratin, type II<br>cytoskeletal 6A                             | 5.96 | 0.053        | 6.65  | 0.054 | 7.47   | <b>0.047</b> |
| <b>Cadr_000025199</b> | ENSG0000021445<br>6 | Q00G26 | PLIN5  | Perilipin-5                                                     | 2.84 | <b>0.048</b> | 0.845 | 0.6   | 0.586  | 0.97         |
| <b>Cadr_000025074</b> |                     |        |        |                                                                 | 1.12 | <b>0.05</b>  | 0.453 | 0.42  | 0.0936 | 1            |
